# Supplementary material
Source: publisher site journal article supplement (https://www.degruyterbrill.com/publication/isbn/9783110218893/downloadAsset/9783110218893_Inhaltsverzeichnis.pdf)
Supplement: Supplementary file 1 [file 9783110218893_Inhaltsverzeichnis.pdf]

# Inhaltsverzeichnis

|                                                                                                                |     |
|----------------------------------------------------------------------------------------------------------------|-----|
| Vorwort und Dank .....                                                                                         | VII |
| I Einführung .....                                                                                             | I   |
| 1.1 Gegenstand, Fragestellung und Ziel .....                                                                   | 1   |
| 1.2 Zum Forschungskontext .....                                                                                | 9   |
| 1.3 Datenerhebung, Transkription und Analyse .....                                                             | 17  |
| 1.4 Redebegleitende Gesten: eine kurze Übersicht<br>aus semiotischer Perspektive .....                         | 20  |
| 1.4.1 Gestische und lautsprachliche Zeichen .....                                                              | 20  |
| 1.4.2 Gestentypen: Ikon, Index, Symbol .....                                                                   | 24  |
| 1.4.3 Gestische Darstellungsweisen nach Müller:<br>die Hand agiert, modelliert, zeichnet, verkörpert .....     | 28  |
| 1.5 Das Problem der gestischen Bezugnahme: mittelbare<br>und unmittelbare Referenz bei ikonischen Gesten ..... | 30  |
| 1.6 Zum Aufbau der Arbeit .....                                                                                | 33  |
| 2 Multimedialität und Multimodalität:<br>Gesten und Lautsprache .....                                          | 36  |
| 2.1 Problemdarstellung .....                                                                                   | 36  |
| 2.2 Ist Sprache multimedial oder multimodal?<br>Eine begriffliche Klärung .....                                | 37  |
| 2.3 Definitionen .....                                                                                         | 47  |
| 2.3.1 Multimodalität im engeren Sinn .....                                                                     | 47  |
| 2.3.2 Multimodalität im weiteren Sinn .....                                                                    | 47  |
| 2.3.3 Multimedialität .....                                                                                    | 48  |
| 2.3.4 Übersicht .....                                                                                          | 49  |
| 2.4 System und Performanz: Stetters These der<br>Unhintergebarkeit der Medialität der Sprache .....            | 50  |
| 2.5 System und Performanz: Argumente für die<br>Unhintergebarkeit der Multimodalität der Sprache .....         | 57  |
| 2.5.1 Pike .....                                                                                               | 57  |
| 2.5.2 Hjelmslev .....                                                                                          | 61  |
| 2.5.3 Bühler .....                                                                                             | 65  |
| 2.5.4 Wundt .....                                                                                              | 69  |

|       |                                                                                                     |     |
|-------|-----------------------------------------------------------------------------------------------------|-----|
| 2.5.5 | Zwischenfazit .....                                                                                 | 74  |
| 2.6   | Zusammenfassung .....                                                                               | 75  |
| 3     | Syntaktische Komponenten:                                                                           |     |
|       | Semantisierung und Typisierbarkeit .....                                                            | 77  |
| 3.1   | Problemdarstellung .....                                                                            | 77  |
| 3.2   | Stetters Begriff der Typisierung .....                                                              | 79  |
| 3.3   | Phonaestheme und die Semantisierung submorphematischer<br>Einheiten in der Lautsprache .....        | 87  |
| 3.4   | Kinaestheme und die Semantisierung gestischer<br>Formmerkmale .....                                 | 101 |
| 3.5   | Kendons Kontinuum der Gebärden: eine Revision .....                                                 | 116 |
| 3.6   | Zusammenfassung .....                                                                               | 121 |
| 4     | Syntaktische Strukturen: Konstituenz und Rekursivität .....                                         | 123 |
| 4.1   | Problemdarstellung .....                                                                            | 123 |
| 4.2   | Syntax und Medialität: die mehrdimensionale Syntax<br>der Gesten .....                              | 128 |
| 4.3   | Lineare Strukturen: Gestenphasen nach Kendon .....                                                  | 140 |
| 4.4   | Lineare Strukturen: Konstituentenstruktur<br>und Markierungsstruktur .....                          | 143 |
| 4.5   | Lineare Strukturen: Gesten und strukturelle Komplexität .....                                       | 154 |
| 4.5.1 | Rekursion und Iteration .....                                                                       | 154 |
| 4.5.2 | Selbsteinbettung: Gesture Units .....                                                               | 155 |
| 4.5.3 | Koordination: Strokes .....                                                                         | 165 |
| 4.6   | Ersetzungsregeln .....                                                                              | 174 |
| 4.7   | Syntaktische Relationen: Kopf, Kern und Modifikation .....                                          | 181 |
| 4.8   | Zusammenfassung .....                                                                               | 185 |
| 5     | Syntaktische Funktionen: Multimodale Attribuierung<br>in Nominalgruppen .....                       | 189 |
| 5.1   | Problemdarstellung .....                                                                            | 189 |
| 5.2   | Sind Gesten attributfähig? Eine Beispielanalyse .....                                               | 193 |
| 5.3   | Linguistische Attributkonzepte .....                                                                | 202 |
| 5.3.1 | Attribuierung und Prädikation .....                                                                 | 202 |
| 5.3.2 | Attribuierung und Determination .....                                                               | 208 |
| 5.4   | Die Integration von Gesten in Nominalgruppen durch<br><i>so</i> , <i>solch</i> und <i>son</i> ..... | 213 |
| 5.5   | Extensionale und intensionale Determination:<br>objekt- und interpretantenbezogene Gesten .....     | 230 |
| 5.6   | Zusammenfassung .....                                                                               | 254 |

|     |                                                    |     |
|-----|----------------------------------------------------|-----|
| 6   | Schluss .....                                      | 256 |
| 6.1 | Zusammenfassung .....                              | 256 |
| 6.2 | Implikationen für eine multimodale Grammatik ..... | 258 |
| 6.3 | Forschungsausblick .....                           | 261 |
| 7   | Anhang .....                                       | 263 |
| 7.1 | Abkürzungen und Notationskonventionen .....        | 263 |
| 7.2 | Der Parcours am Potsdamer Platz .....              | 267 |
| 7.3 | Abbildungsverzeichnis .....                        | 272 |
| 7.4 | Tabellenverzeichnis .....                          | 276 |
|     | Literatur .....                                    | 277 |
|     | Sachregister .....                                 | 293 |
